# Supplementary material
Source: publisher site journal article supplement (http://kjim.org/upload/media/kjim-2023-206-Supplementary-7.pdf)

## 7. Literature selection

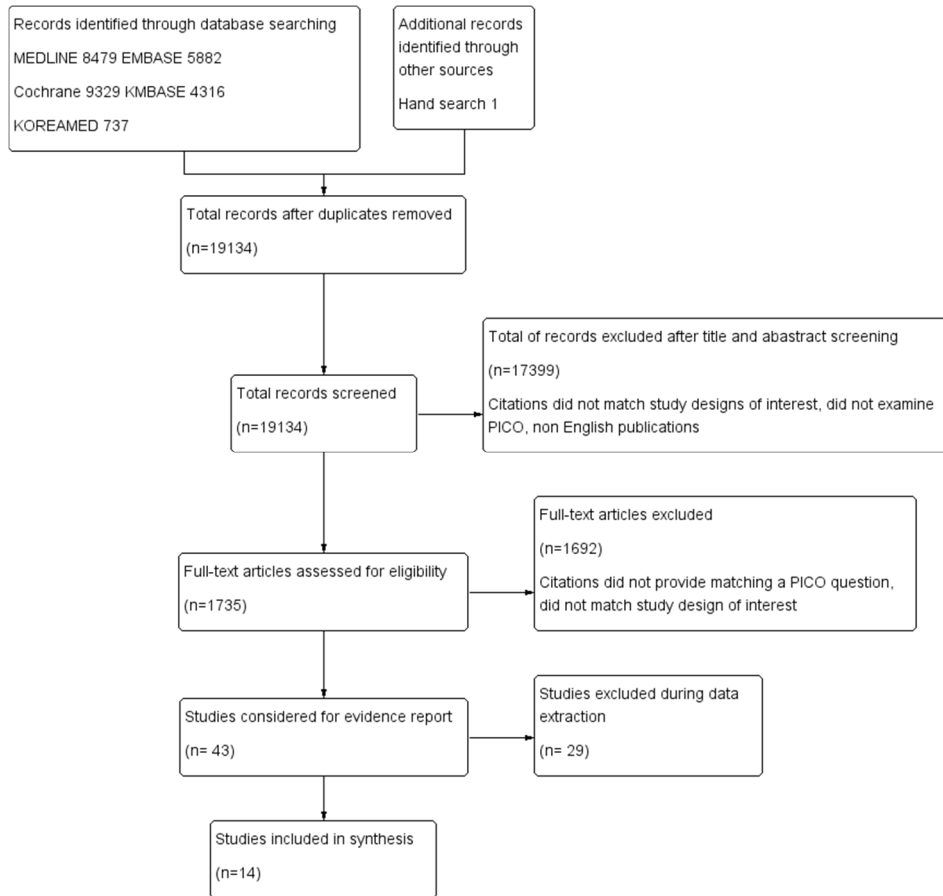

Supplement: Supplementary file 1 [file kjim-2023-206-Supplementary-7.pdf]
